# Supplementary material for: Collaborative ISL1/GATA3 interaction in controlling neuroblastoma oncogenic pathways overlapping with but distinct from MYCN
Source: PubMed Central journal article supplement — Theranostics. 2019 Jan 30;9(4):986–1000. doi: 10.7150/thno.30199 (PMC6401405; doi:10.7150/thno.30199), 2019-01-30
Supplement: thnov09p0986s1.pdf [file thnov09p0986s1.pdf]

# Supplementary Figures

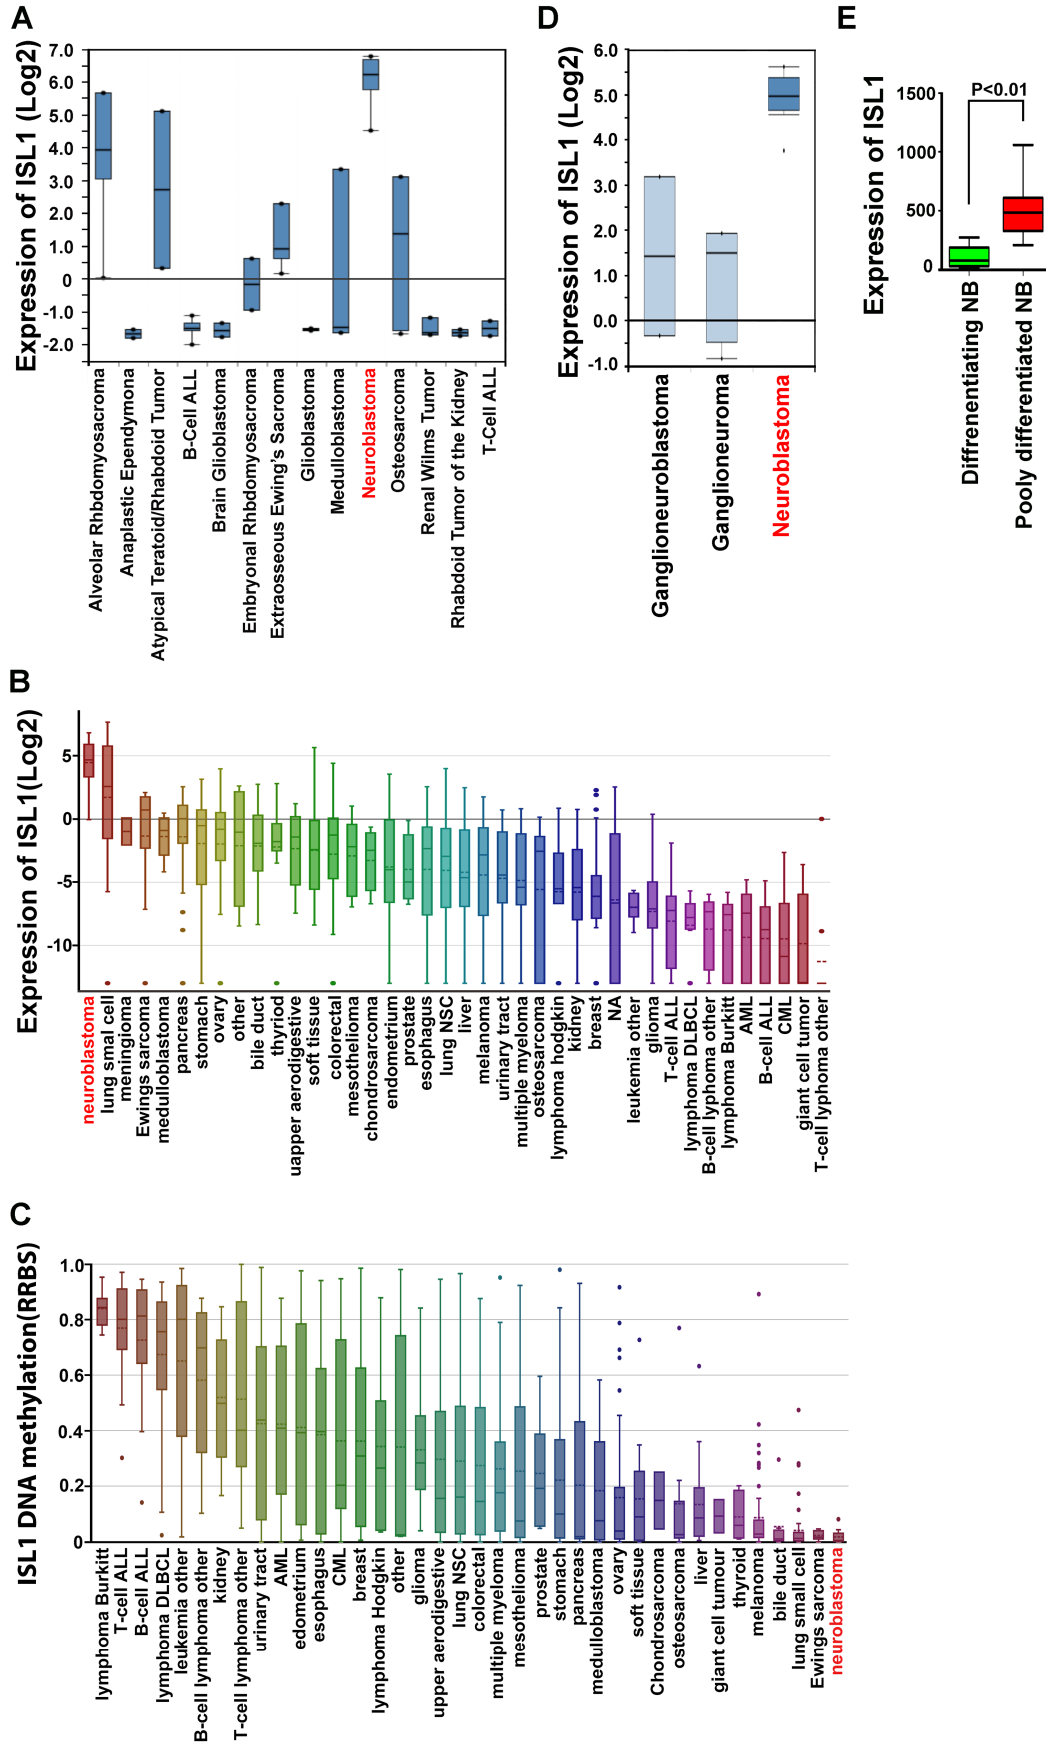

### Supplementary Figure 1. The expression of *ISL1* in neuroblastoma

(A) Box-plots of *ISL1* expression in Neale Multi-cancer study. Data obtained through Oncomine.org showing that among these pediatric tumors analyzed, *ISL1* is most highly expressed in neuroblastoma. (B.C) Box-plots of expression of *ISL1*(B) and whole-genome DNA methylation profiling(C) showing the highest level of *ISL1* expression and the lowest methylation levels in the gene body of *ISL1* in neuroblastoma among 1457 neoplasm cell lines. Data were obtained from CCLE (<https://portals.broadinstitute.org/ccle>). (D) Box-plots of expression of *ISL1* among neuroblastic tumors in Albino Neuroblastic-Tumor study. Data were obtained from Oncomine.org. (E) Analysis of Bourdeut's published neuroblastomas gene expression microarray dataset showing that *ISL1* expression in poorly differentiated is markedly raised than more differentiated neuroblastomas.

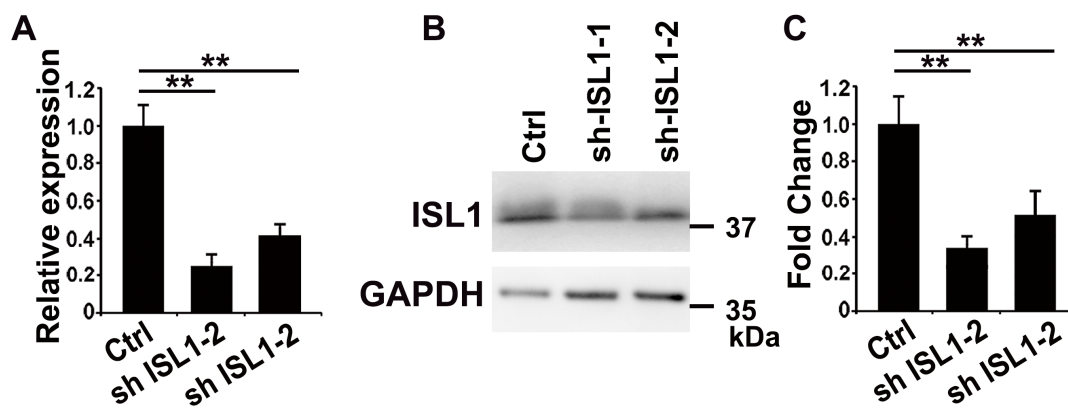

### Supplementary Figure 2. Validation of shRNA-mediated knockdown *ISL1* in SK-N-BE(2) cells

(A) qPCR analysis of *ISL1* expression in *ISL1* KD SK-N-BE(2) cells mediated by *sh ISL1-1* and *sh ISL1-2*. Error bars represent  $\pm$ SD, n=5, \*p<0.05; \*\*p<0.01. (B, C)

Validation by Western blot analysis of shRNA-mediated knockdown *ISL1* in SK-N-BE(2) cells. (C) Quantification of Western blots. Error bars represent  $\pm$ SD, n=5, \*p<0.05; \*\*p<0.01.

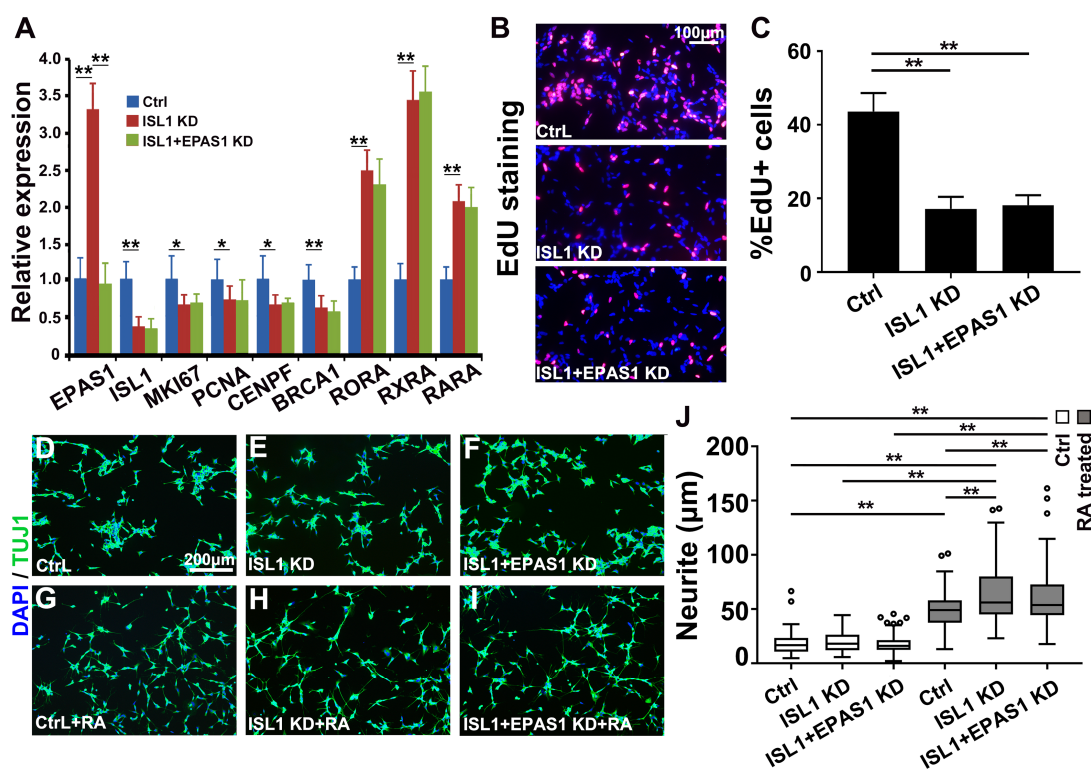

**Supplementary Figure 3. Prevention of *EPAS1* elevation in *ISL1* KD SH-SY5Y cells is not able to restore neuroblastoma proliferation and RA-induced neurite outgrowth.**

(A) qPCR analysis of *ISL1* KD and *ISL1+EPAS1* KD SH-SY5Y cells, showing downregulation of *EPAS1* in *ISL1* KD cells cannot restore expression of cell cycle-related genes and RA receptors. Error bars represent  $\pm$ SD, n=3, \*p<0.05; \*\*p<0.01, 2-tailed t-test. (B) EdU staining showing Knockdown of *EPAS1* is not able to restore the proliferation of *ISL1* KD neuroblastoma cells. (C) Quantification of EdU-positive cells. Error bars represent  $\pm$ SD, n=5, \*p<0.05; \*\*p<0.01. (D, E) neurite outgrowth of *ISL1*

KD, *ISL1/EPAS1*-double KD and control SH-SY5Y cells in the presence or absence of RA. Cells were fixed at 72 hours after RA or DMSO treatment and stained with *TUJ1* antibody. The images from three biological replicates were pooled, and the length of longest neurite of individual cells was measured. The number of measured cells (n) per culture is 100. (\*p<0.05; \*\*p<0.01; 2-tailed t-test).

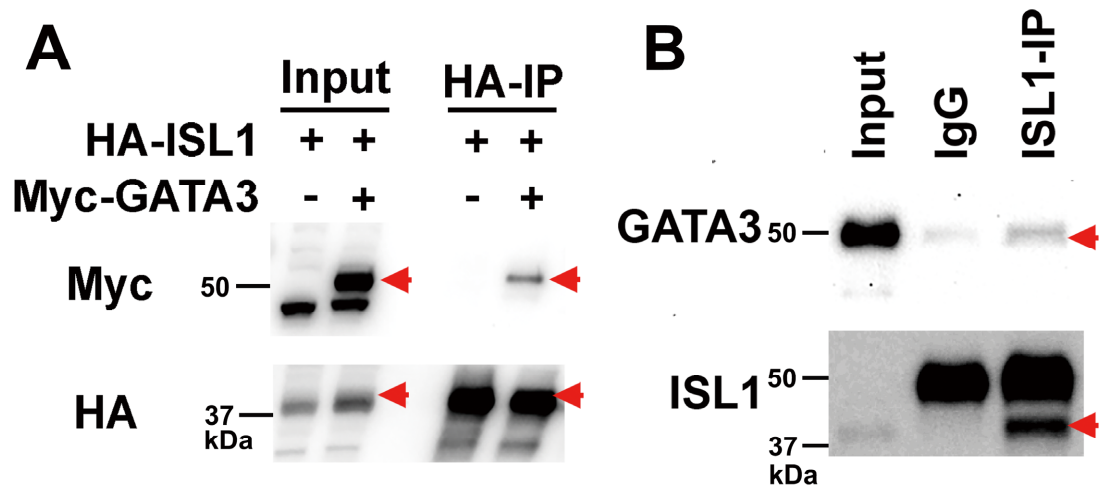

#### Supplementary Figure 4. Coimmunoprecipitation of ISL1 and GATA3

(A) Coimmunoprecipitation (IP) of ISL1 and GATA3 in HEK293T cells co-transfected with HA-ISL1 and Myc-GATA3. (IP with anti-HA antibody). Myc-GATA3 and HA-ISL1 (red arrowhead) were shown by Western blot using anti-Myc antibody and anti-HA antibody, respectively. (B) Coimmunoprecipitation of endogenous ISL1 and GATA3. Anti-ISL1 antibody was used for IP in SH-SY5Y cells. GATA3 and ISL1 (red arrowhead) were shown by Western blot.

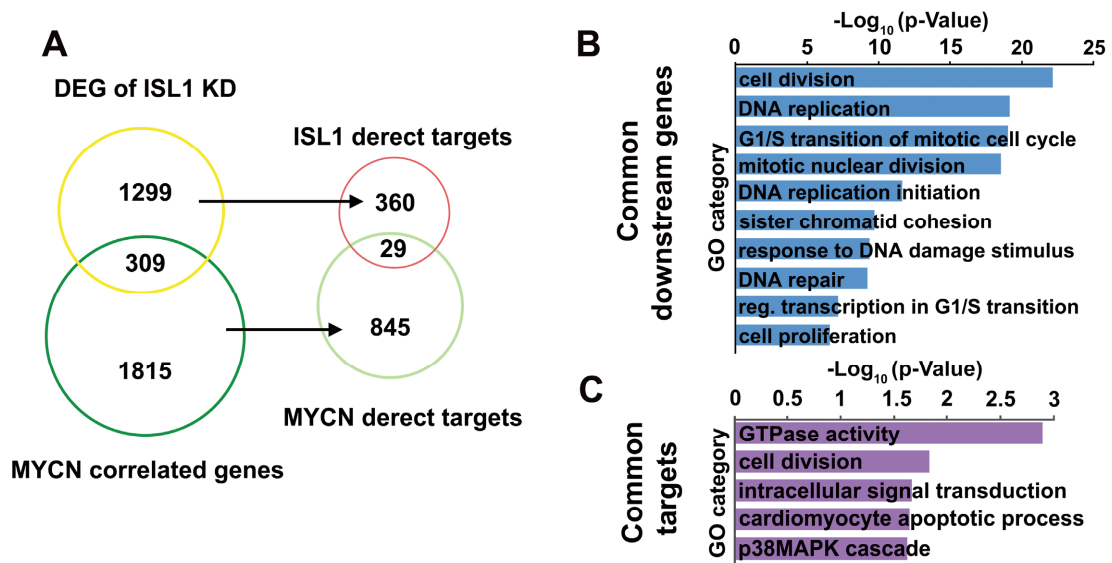

**Supplementary Figure 5. Common downstream genes and common targets of *ISL1* and *MYCN*.**

(A) Overlay of the 1608 DEGs (differentially expressed genes) found in *ISL1* KD SH-SY5Y cells with 2124 *MYCN*-correlated genes identified in Hsu's study by calculating the Spearman correlation coefficient between *MYCN* and other genes in neuroblastoma gene expression data. 309 genes are common downstream genes of *ISL1* and *MYCN* (left panel), only 29 common targets of *ISL1* and *MYCN* found by intersection of 389 *ISL1* direct targets and 874 *MYCN* direct targets identified in Hsu's study (right panel).

(B) GO analysis of common downstream genes of *ISL1* and *MYCN*. (C) GO analysis of common targets of *ISL1* and *MYCN*.

Supplementary Table 3 - Homor Known Motif Enrichment Results (ISL1 CHIP-seq peak)

| Rank | Motif | Name                                                              | P-value | log P-value | q-value (Benjamini) | # Target Sequences with Motif | % of Targets Sequences with Motif | # Background Sequences with Motif | % of Background Sequences with Motif |
|------|-------|-------------------------------------------------------------------|---------|-------------|---------------------|-------------------------------|-----------------------------------|-----------------------------------|--------------------------------------|
| 1    |       | Phox2a(Homeobox)/Neuron-Phox2a-ChIP-Seq(GSE31456)/Homer           | 1e-474  | -1.092e+03  | 0.0000              | 1699.0                        | 22.33%                            | 2464.9                            | 6.08%                                |
| 2    |       | GATA3(Zf)/Treg-Gata3-ChIP-Seq(GSE20898)/Homer                     | 1e-449  | -1.036e+03  | 0.0000              | 3021.0                        | 39.71%                            | 7110.6                            | 17.55%                               |
| 3    |       | Isl1(Homeobox)/Neuron-Isl1-ChIP-Seq(GSE31456)/Homer               | 1e-434  | -9.996e+02  | 0.0000              | 3438.0                        | 45.20%                            | 8949.5                            | 22.08%                               |
| 4    |       | Gata4(Zf)/Heart-Gata4-ChIP-Seq(GSE35151)/Homer                    | 1e-420  | -9.686e+02  | 0.0000              | 2263.0                        | 29.75%                            | 4522.6                            | 11.16%                               |
| 5    |       | Nkx6.1(Homeobox)/Isl1-Nkx6.1-ChIP-Seq(GSE40975)/Homer             | 1e-384  | -8.854e+02  | 0.0000              | 4519.0                        | 59.41%                            | 14466.9                           | 35.70%                               |
| 6    |       | Lhx3(Homeobox)/Neuron-Lhx3-ChIP-Seq(GSE31456)/Homer               | 1e-375  | -8.636e+02  | 0.0000              | 3388.0                        | 44.54%                            | 9300.9                            | 22.95%                               |
| 7    |       | Gata2(Zf)/K562-GATA2-ChIP-Seq(GSE18829)/Homer                     | 1e-356  | -8.204e+02  | 0.0000              | 1628.0                        | 21.40%                            | 2830.5                            | 6.98%                                |
| 8    |       | Gata1(Zf)/K562-GATA1-ChIP-Seq(GSE18829)/Homer                     | 1e-338  | -7.794e+02  | 0.0000              | 1481.0                        | 19.47%                            | 2478.7                            | 6.12%                                |
| 9    |       | Lhx1(Homeobox)/EmbryoCarcinoma-Lhx1-ChIP-Seq(GSE70957)/Homer      | 1e-295  | -6.805e+02  | 0.0000              | 2545.0                        | 33.46%                            | 6574.5                            | 16.22%                               |
| 10   |       | Lhx2(Homeobox)/HFSC-Lhx2-ChIP-Seq(GSE48068)/Homer                 | 1e-236  | -5.438e+02  | 0.0000              | 2241.0                        | 29.46%                            | 5951.6                            | 14.69%                               |
| 11   |       | Olig2(bHLH)/Neuron-Olig2-ChIP-Seq(GSE30882)/Homer                 | 1e-234  | -5.399e+02  | 0.0000              | 2476.0                        | 32.55%                            | 6928.3                            | 17.10%                               |
| 12   |       | Atoh1(bHLH)/Cerebellum-Atoh1-ChIP-Seq(GSE22111)/Homer             | 1e-233  | -5.386e+02  | 0.0000              | 1606.0                        | 21.11%                            | 3568.1                            | 8.80%                                |
| 13   |       | Nanog(Homeobox)/mES-Nanog-ChIP-Seq(GSE11724)/Homer                | 1e-200  | -4.627e+02  | 0.0000              | 4730.0                        | 62.18%                            | 18185.8                           | 44.88%                               |
| 14   |       | NeuroD1(bHLH)/Isl1-NeuroD1-ChIP-Seq(GSE30298)/Homer               | 1e-190  | -4.377e+02  | 0.0000              | 1192.0                        | 15.67%                            | 2476.5                            | 6.11%                                |
| 15   |       | NF1(CTF)/LNCaP-NF1-ChIP-Seq(Unpublished)/Homer                    | 1e-154  | -3.568e+02  | 0.0000              | 661.0                         | 8.69%                             | 1045.9                            | 2.58%                                |
| 16   |       | GATA(Zf),IR3/Treg-Gata3-ChIP-Seq(GSE20898)/Homer                  | 1e-147  | -3.401e+02  | 0.0000              | 514.0                         | 6.76%                             | 686.2                             | 1.69%                                |
| 17   |       | SCL(bHLH)/HPC7-Sc1-ChIP-Seq(GSE13511)/Homer                       | 1e-143  | -3.312e+02  | 0.0000              | 4259.0                        | 55.99%                            | 16776.4                           | 41.40%                               |
| 18   |       | GATA(Zf),IR4/Treg-Gata3-ChIP-Seq(GSE20898)/Homer                  | 1e-124  | -2.875e+02  | 0.0000              | 344.0                         | 4.52%                             | 366.3                             | 0.90%                                |
| 19   |       | Bapx1(Homeobox)/VertebralCol-Bapx1-ChIP-Seq(GSE36672)/Homer       | 1e-112  | -2.599e+02  | 0.0000              | 2124.0                        | 27.92%                            | 7061.6                            | 17.43%                               |
| 20   |       | Ascl1(bHLH)/NeuralTubes-Ascl1-ChIP-Seq(GSE55840)/Homer            | 1e-108  | -2.499e+02  | 0.0000              | 1603.0                        | 21.07%                            | 4883.7                            | 12.05%                               |
| 21   |       | Tcf21(bHLH)/ArterySmoothMuscle-Tcf21-ChIP-Seq(GSE61369)/Homer     | 1e-105  | -2.426e+02  | 0.0000              | 1158.0                        | 15.22%                            | 3131.5                            | 7.73%                                |
| 22   |       | NF1-halfsite(CTF)/LNCaP-NF1-ChIP-Seq(Unpublished)/Homer           | 1e-94   | -2.165e+02  | 0.0000              | 1839.0                        | 24.18%                            | 6124.6                            | 15.11%                               |
| 23   |       | Ptf1a(bHLH)/Panc1-Ptf1a-ChIP-Seq(GSE47459)/Homer                  | 1e-89   | -2.067e+02  | 0.0000              | 2362.0                        | 31.05%                            | 8573.6                            | 21.16%                               |
| 24   |       | Pdx1(Homeobox)/Isl1-Pdx1-ChIP-Seq(SRA008281)/Homer                | 1e-87   | -2.008e+02  | 0.0000              | 1557.0                        | 20.47%                            | 5015.2                            | 12.38%                               |
| 25   |       | Nkx2.5(Homeobox)/HL1-Nkx2.5.biotin-ChIP-Seq(GSE21529)/Homer       | 1e-85   | -1.969e+02  | 0.0000              | 2093.0                        | 27.51%                            | 7420.7                            | 18.31%                               |
| 26   |       | Pax7(Paired,Homeobox),long/Myoblast-Pax7-ChIP-Seq(GSE25064)/Homer | 1e-81   | -1.877e+02  | 0.0000              | 171.0                         | 2.25%                             | 133.0                             | 0.33%                                |
| 27   |       | Tlx?(NR)/NPC-H3K4me1-ChIP-Seq(GSE16256)/Homer                     | 1e-80   | -1.856e+02  | 0.0000              | 541.0                         | 7.11%                             | 1140.6                            | 2.81%                                |
| 28   |       | Tgif2(Homeobox)/mES-Tgif2-ChIP-Seq(GSE55404)/Homer                | 1e-78   | -1.805e+02  | 0.0000              | 3166.0                        | 41.62%                            | 12711.5                           | 31.37%                               |
| 29   |       | Nkx3.1(Homeobox)/LNCaP-Nkx3.1-ChIP-Seq(GSE28264)/Homer            | 1e-75   | -1.730e+02  | 0.0000              | 2126.0                        | 27.95%                            | 7788.4                            | 19.22%                               |
| 30   |       | Smad2(MAD)/ES-SMAD2-ChIP-Seq(GSE29422)/Homer                      | 1e-71   | -1.643e+02  | 0.0000              | 1414.0                        | 18.59%                            | 4670.0                            | 11.52%                               |

### Supplementary Table 6 - sequence sets used for RNAi

| Gene symbols | sequences              |
|--------------|------------------------|
| sh ISL1-1    | GCAAGTGAAGTAGCATCAATGT |
| sh ISL1-2    | GGCATGAGGAACATTTCATTCT |
| sh GATA3     | GGGCTCTACTACAAGCTTCAC  |
| sh Ctrl      | CCTAAGGTTAAGTCGCCCTCG  |

| Gene symbols        | sequences             |
|---------------------|-----------------------|
| si Ctrl sense       | UUCUCCGAACGUGUCACGUTT |
| si Ctrl anti-sense  | ACGUGACACGUUCGGAGAATT |
| si MYCN sense       | GCCACUGAGUAUGUCCACUTT |
| si MYCN anti-sense  | AGUGGACAUACUCAGUGGCTT |
| si EPAS1 sense      | GCCACAGCAUGGACAUGAATT |
| si EPAS1 anti-sense | UUCAUGUCCAUGCUGUGGCTT |

### Supplementary Table 7 - primer list

| Gene        | odut long | Primer Sequence           |
|-------------|-----------|---------------------------|
| qISL1_for   | 114       | GTGTATCACATCGAGTGTTC      |
| qISL1_rev   | 114       | CACCACATCGTGGTCTGC        |
| qISL1_for   | 85        | AAGGACAAGAAGCGAAGCAT      |
| qISL1_rev   | 85        | TTCCTGTCATCCCCTGGATA      |
| qGATA3_for  | 170       | AATGAACGGACAGAACCGG       |
| qGATA3_rev  | 170       | TGTGAAGCTTGTAGTAGAGCCC    |
| qMYCN_for   | 176       | ACCCGGACGAAGATGACTTCT     |
| qMYCN_rev   | 176       | CAGCTCGTTCTCAAGCAGCAT     |
| qMYCN_for   | 113       | TGATCCTCAAACGATGCCTTC     |
| qMYCN_rev   | 113       | GGACGCCTCGCTCTTTATCT      |
| qMKI67_for  | 152       | AAGAAGAGGTCCTACCAGTCG     |
| qMKI67_rev  | 152       | CATCCCAGTTCATAGTTTGC      |
| qCENPF_for  | 97        | ATAAACTCACATCAGTAAAGCAACA |
| qCENPF_rev  | 97        | ATCTGACTCGCCTGGAACG       |
| qBRCA1_for  | 173       | GTTACTGAGCCACAGATAATACAAG |
| qBRCA1_rev  | 173       | TGACCATTCTGCTCCGTTT       |
| qBARD1_for  | 94        | CTGCTCGCGTTGTAACAT        |
| qBARD1_rev  | 94        | TCCAATGCAGTCACTTACACAAT   |
| qCCNE1_for  | 104       | GCCAGCCTTGGACAATAATG      |
| qCCNE1_rev  | 104       | CTTGACGTTGAGTTTGGGT       |
| qCDCA4_for  | 161       | TCAGCACAGGCACCAAGGCA      |
| qCDCA4_rev  | 161       | GGGCTGTCCACGTCTGAGAACA    |
| qAURKA_for  | 108       | GGAATATGCACCACTTGAACA     |
| qAURKA_rev  | 108       | TAAGACAGGGCATTGCCAAT      |
| qLMO1_for   | 121       | TCTGCTGAAGGCATTGGA        |
| qLMO1_rev   | 121       | TCGGCACAGGATGAGGTT        |
| qLIN28B_for | 199       | ATATCGGTGTGCTGTGATGC      |
| qLIN28B_rev | 199       | TGAGCAACGCTTATCATGTTTT    |
| qCTBP2_for  | 108       | ATCCACGAGAAGGTTCTAAACGA   |
| qCTBP2_rev  | 108       | CCGCACGATCACTCTCAGG       |
| qMYB_for    | 127       | GAGGTGGCATAACCACTTGAA     |
| qMYB_rev    | 127       | AGGCAGTAGCTTTGCGATTTT     |
| qLOX_for    | 128       | CGGCGGAGGAAAACGTCT        |
| qLOX_rev    | 128       | TCGGCTGGGTAAGAAATCTGA     |
| qLUM_for    | 120       | TGAGCTGGGCTGTCCTTTCTCC    |
| qLUM_rev    | 120       | CCCAGTCACGCCAGTCTCTGAA    |
| qMMP2_for   | 112       | GATACCCCTTTGACGGTAAGGA    |
| qMMP2_rev   | 112       | CCTTCTCCAAGGTCCATAGC      |

|              |     |                          |
|--------------|-----|--------------------------|
| qRXRA_for    | 89  | GACGGAGCTTGTGTCCAAGAT    |
| qRXRA_rev    | 89  | AGTCAGGGTTAAAGAGGACGAT   |
| qRORA_for    | 102 | ACTGGTGTGCATAGCGGAGGTT   |
| qRORA_rev    | 102 | CCTGCGGACTGGCAATAATCGG   |
| qRARA_for    | 109 | GGCAAATACACTACGAACAACA   |
| qRARA_rev    | 109 | CTCCACAGTCTTAATGATGCACT  |
| qRET_for     | 100 | AAAGTGGCATTGGGCCTCTAC    |
| qRET_rev     | 100 | GCAGGGCATGGACGTACAG      |
| qVIP_for     | 114 | GACACCAGAAATAAGGCCAG     |
| qVIP_rev     | 114 | GTCACCCAACCTGAGAGCAG     |
| qEPAS1_for   | 115 | CGGAGGTGTTCTATGAGCTGG    |
| qEPAS1_rev   | 115 | AGCTTGTGTGTTCCGAGGAA     |
| qSYT4_for    | 113 | ATGGGATACCCTACACCCAAAT   |
| qSYT4_rev    | 113 | TCCCAGAGAGAGGAATTAGAACTT |
| qSPRY1_for   | 102 | GAGAGAGATTCAGCCTACTGCT   |
| qSPRY1_rev   | 102 | GCAGGTCTTTTCACCACCGAA    |
| qTP53_for    | 110 | GTGCGTGTTTGTGCCTGTCCT    |
| qTP53_rev    | 110 | AGTGCTCGCTTAGTGCTCCCT    |
| qHAND2_for   | 118 | GATTCCGGGTTAGCTTCGGTGC   |
| qHAND2_rev   | 118 | GGAGGCAGAATCCTCTCGTGCT   |
| qCDKN1A_for  | 139 | TGTCCGTCAGAACCCATGC      |
| qCDKN1A_rev  | 139 | AAAGTCGAAGTTCCATCGCTC    |
| qPCNA_for    | 85  | GTTCGCCCGCTCGCTCTGA      |
| qPCNA_rev    | 85  | TGGCAACAACGCCGCTACA      |
| LMO1 luc_fov | 553 | GTAGGGGTTGGAGTTCAGC      |
| LMO1 luc_rev | 553 | AGGGGCTCTGTAGTCTCCT      |
